# Supplementary material for: Rapid evaluation of oxygen vacancies-enhanced photogeneration of the superoxide radical in nano-TiO2 suspensions
Source: Royal Society of Chemistry journal article supplement (doi:10.1039/d0ra06299e), 2020-01-01
Supplement: d0ra06299e1.pdf [file d0ra06299e1.pdf]

## Electronic supplementary information

### Rapid Evaluation of Oxygen Vacancies–Enhanced Photogeneration of Superoxide Radical in Nano-TiO<sub>2</sub> Suspensions

Wanchao Yu<sup>a, b</sup>, Fengjie Chen<sup>a, b</sup>, Yarui Wang<sup>a, b</sup>, Lixia Zhao<sup>\*, a, c</sup>

<sup>a</sup> State Key Laboratory of Environmental Chemistry and Eco-toxicology, Research Center for Eco-environmental Sciences, Chinese Academy of Sciences, 18 Shuangqing Road, P.O. Box 2871, Beijing 100085, China

<sup>b</sup> University of Chinese Academy of Sciences, Beijing 100039, China

<sup>c</sup> Institute of Environment and Health, Hangzhou Institute for Advanced Study, UCAS.

\*To whom correspondence should be addressed: E-mail: [zlx@rcees.ac.cn](mailto:zlx@rcees.ac.cn) (LZ);

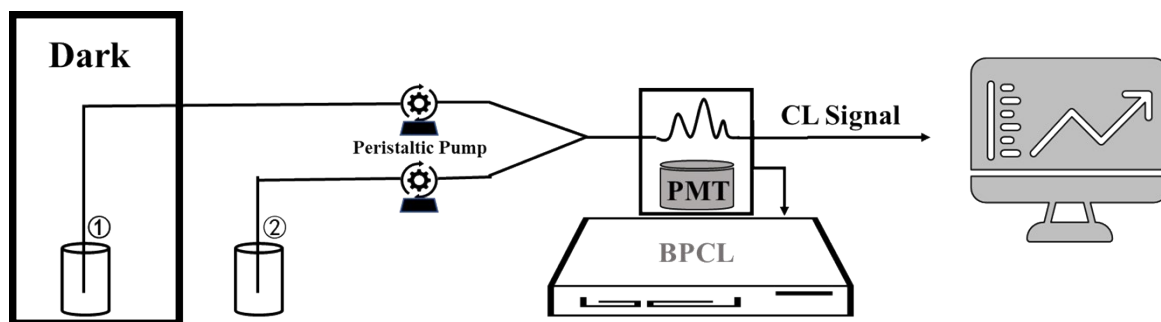

Figure S1. CFCL experimental setup : ① Nano-TiO<sub>2</sub> suspension, ② luminol;

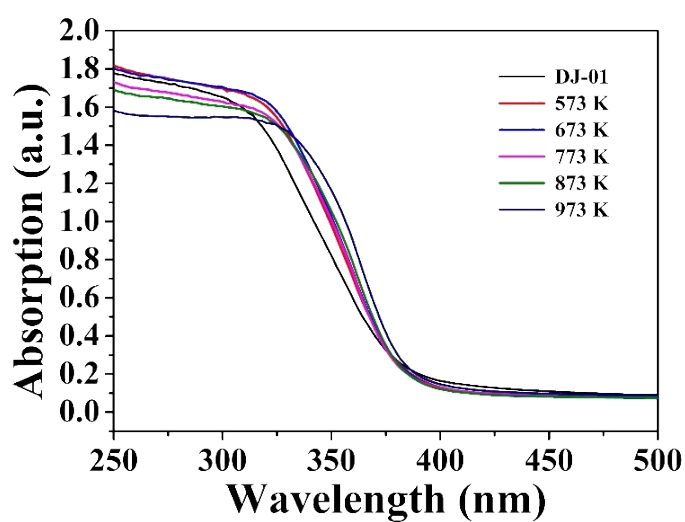

Figure S2. UV-vis diffuse reflectance spectra of TiO<sub>2</sub> nanoparticles.

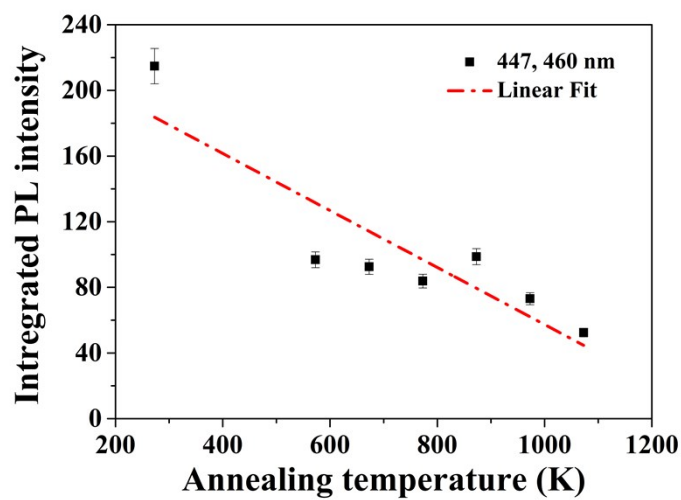

Figure S3. Totally integrated peak intensity at 447 nm and 460 nm for nano-TiO<sub>2</sub> samples.

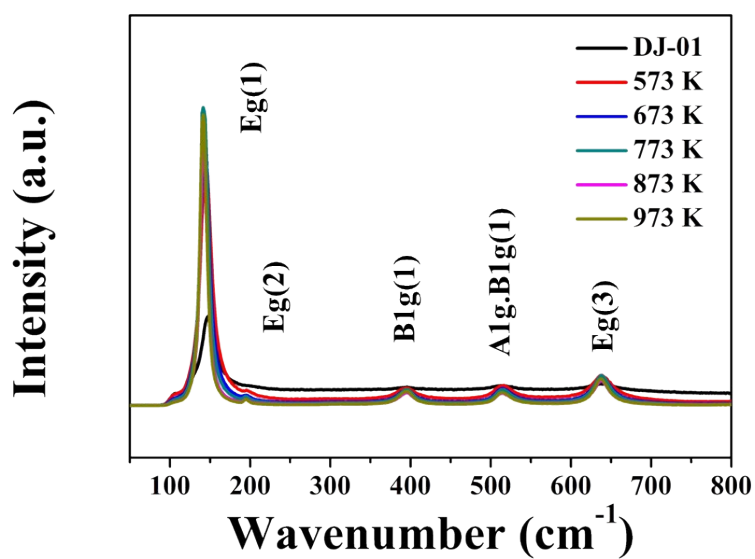

Figure S4. The Raman spectra of nano-TiO<sub>2</sub> samples.

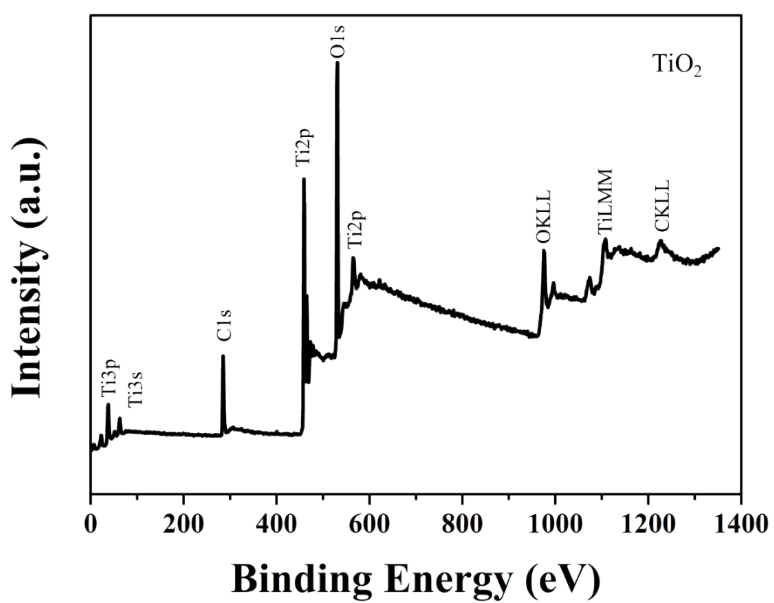

Figure S5. XPS survey scan obtained on TiO<sub>2</sub> (DJ-01) sample.

**Table S1.** Physical properties of TiO<sub>2</sub> samples.

| <b>Samples</b> | <b>Calcination Temperature (K)</b> | <b>Primary Particle size (nm)</b> | <b>Anatase (%)</b> | <b>BET surface area (m<sup>2</sup> g<sup>-1</sup>)</b> | <b>Band gap (eV)</b> |
|----------------|------------------------------------|-----------------------------------|--------------------|--------------------------------------------------------|----------------------|
| <b>DJ-01</b>   | <b>Non-calcined</b>                | <b>8</b>                          | <b>100</b>         | <b>149</b>                                             | <b>3.10</b>          |
| —              | <b>573 K</b>                       | <b>12</b>                         | <b>100</b>         | <b>88</b>                                              | <b>3.12</b>          |
| —              | <b>673 K</b>                       | <b>17</b>                         | <b>100</b>         | <b>59</b>                                              | <b>3.14</b>          |
| —              | <b>773 K</b>                       | <b>25</b>                         | <b>100</b>         | <b>43</b>                                              | <b>3.16</b>          |
| —              | <b>873 K</b>                       | <b>40</b>                         | <b>100</b>         | <b>31</b>                                              | <b>3.20</b>          |
| —              | <b>973 K</b>                       | <b>66</b>                         | <b>100</b>         | <b>17</b>                                              | <b>3.20</b>          |

**Table S2.** XPS results of different chemical states of O elements at the surface of TiO<sub>2</sub> samples.

| <b>Samples</b>      | <b>Binding energy (eV)</b> |                              |                            |                           | <b>O<sub>L</sub> (%)</b> | <b>O<sub>.OH</sub> (%)</b> | <b>O<sub>s</sub> (%)</b> | <b>Evaluated V<sub>O</sub> (%)</b> |
|---------------------|----------------------------|------------------------------|----------------------------|---------------------------|--------------------------|----------------------------|--------------------------|------------------------------------|
|                     | <b>O1s (O<sub>L</sub>)</b> | <b>O1s (O<sub>.OH</sub>)</b> | <b>O1s (O<sub>s</sub>)</b> | <b>Ti2p<sub>2/3</sub></b> |                          |                            |                          |                                    |
| <b>Non-calcined</b> | 530.21                     | 531.34                       | 532.60                     | 458.61                    | 66.02%                   | 21.43%                     | 12.55%                   | 32.71%                             |
| <b>573 K</b>        | 530.16                     | 531.01                       | 532.05                     | 458.60                    | 79.49%                   | 12.67%                     | 7.84%                    | 18.43%                             |
| <b>673 K</b>        | 530.11                     | 531.04                       | 532.10                     | 458.64                    | 81.67%                   | 10.94%                     | 7.39%                    | 15.10%                             |
| <b>773 K</b>        | 530.26                     | 531.17                       | 532.15                     | 458.66                    | 85.47%                   | 8.42%                      | 6.10%                    | 9.32%                              |
| <b>873 K</b>        | 530.17                     | 531.23                       | 532.22                     | 458.71                    | 86.90%                   | 7.67%                      | 5.43%                    | 7.25%                              |
| <b>973 K</b>        | 530.18                     | 531.34                       | 532.36                     | 458.65                    | 88.27%                   | 6.41%                      | 5.33%                    | 5.17%                              |
